# Supplementary material for: E4-Ubiquitin ligase Ufd2 stabilizes Yap8 and modulates arsenic stress responses independent of the U-box motif
Source: PubMed Central journal article supplement (PMC4582114; doi:10.1242/bio.010405), 2015-08-14
Supplement: supp_bio.010405_BIO010405supp.pdf [file supp_bio.010405_BIO010405supp.pdf]

Supplementary Material

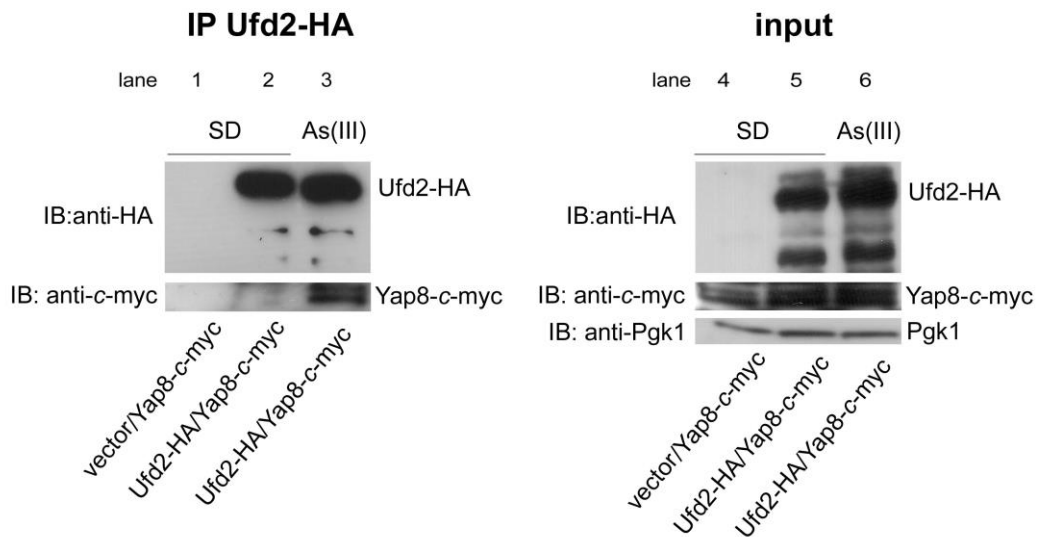

**Fig. S1. Reciprocal co-immunoprecipitation assays showing arsenic-mediated interaction between Yap8 and Ufd2.** BY4742 cells co-transformed with vector/*YAP8-c-myc* (lanes 1 and 4) or *UFD2-HA/YAP8-c-myc* (lanes 2, 3, 5 and 6) were exposed or not to 1.5 mM As(III) for 90 min and Ufd2-HA was immunoprecipitated with anti-HA antibody. Immunoblotting was performed using anti-HA, anti-*c-myc* and anti-Pgk1 antibodies. A representative experiment is shown. IP – immunoprecipitation; IB – immunoblotting; SD – Synthetic Defined medium, control condition.

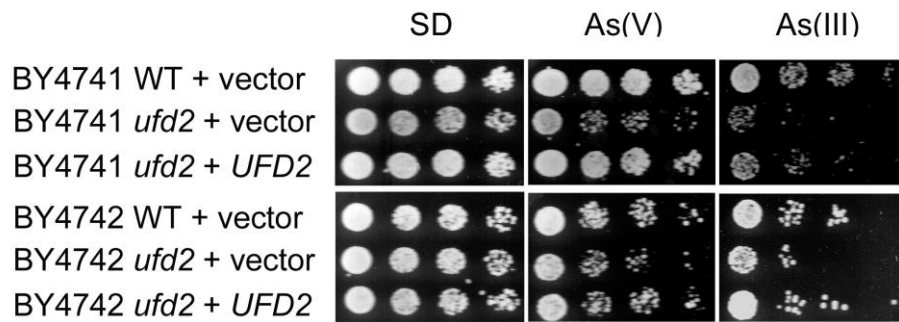

**Fig. S2. As(V)- and As(III)-sensitivity phenotypes of *ufd2* are restored by expressing an episomal copy of *UFD2*.** Exponential phase BY4741 and BY4742 wild type (WT) and *ufd2* cells expressing an episomal copy of *UFD2* or the respective control vector were serially diluted and spotted onto SD media supplemented or not with 2 mM As(V) or 1.5 mM As(III). Growth was recorded after 2 days incubation at 30°C. A representative experiment is shown.

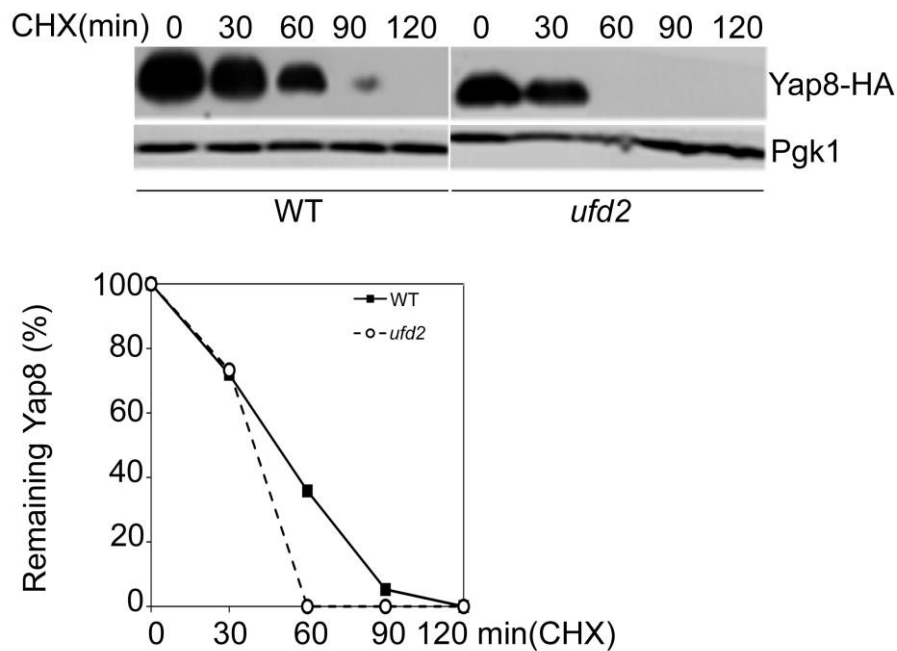

**Fig. S3. Ufd2 mediates Yap8 stabilization under As(V) stress conditions.** BY4742 wild type (WT) and *ufd2* mutant strains expressing Yap8-HA were pre-treated with 2 mM As(V) for 60 min, washed and subsequently treated with 0.1 mg/mL cycloheximide (CHX) up to 120 min prior to immunoblotting using anti-HA and anti-Pgk1 antibodies. The graph represents the percentage of remaining Yap8 protein after CHX addition. A representative experiment is shown.

**Table S1.** *Saccharomyces cerevisiae* strains used in this study

| Strain                                         | Genotype                                                                                                                                                                             | Reference or source            |
|------------------------------------------------|--------------------------------------------------------------------------------------------------------------------------------------------------------------------------------------|--------------------------------|
| BY4742                                         | <i>MAT<math>\alpha</math> his3<math>\Delta</math>1 leu2<math>\Delta</math>0 lys2<math>\Delta</math>0 ura3<math>\Delta</math>0</i>                                                    | EUROSCARF*                     |
| <i>ufd2</i>                                    | <i>MAT<math>\alpha</math> his3<math>\Delta</math>1 leu2<math>\Delta</math>0 lys2<math>\Delta</math>0 ura3<math>\Delta</math>0<br/>YDL190c::<i>kanMX4</i></i>                         | EUROSCARF                      |
| <i>yap8</i>                                    | <i>MAT<math>\alpha</math> his3<math>\Delta</math>1 leu2<math>\Delta</math>0 lys2<math>\Delta</math>0 ura3<math>\Delta</math>0<br/>YPR199c::<i>kanMX4</i></i>                         | EUROSCARF                      |
| <i>yap8ufd2</i>                                | <i>MAT<math>\alpha</math> his3<math>\Delta</math>1 leu2<math>\Delta</math>0 lys2<math>\Delta</math>0 ura3<math>\Delta</math>0<br/>YPR199c::<i>kanMX4</i> YDL190c::<i>HIS3MX4</i></i> | This study                     |
| <i>ubc4</i>                                    | <i>MAT<math>\alpha</math> his3<math>\Delta</math>1 leu2<math>\Delta</math>0 lys2<math>\Delta</math>0 ura3<math>\Delta</math>0<br/>YBR082c::<i>kanMX4</i></i>                         | ATCC**                         |
| <i>rad23</i>                                   | <i>MAT<math>\alpha</math> his3<math>\Delta</math>1 leu2<math>\Delta</math>0 lys2<math>\Delta</math>0 ura3<math>\Delta</math>0<br/>YEL037c::<i>kanMX4</i></i>                         | EUROSCARF                      |
| <i>dsk2</i>                                    | <i>MAT<math>\alpha</math> his3<math>\Delta</math>1 leu2<math>\Delta</math>0 lys2<math>\Delta</math>0 ura3<math>\Delta</math>0<br/>YMR276w::<i>kanMX4</i></i>                         | EUROSCARF                      |
| Y187                                           | <i>MAT<math>\alpha</math> ura3-52 his3-200 ade2-101 trp1-901<br/>leu2-3 112 gal4<math>\Delta</math> met-gal80<math>\Delta</math><br/>URA3::<i>GALIUAS-GALITATA-lacZ MEL1</i></i>     | Clontech Laboratories, Inc.    |
| BY4741                                         | <i>MAT<math>\alpha</math> his3<math>\Delta</math>1 leu2<math>\Delta</math>0 met15<math>\Delta</math>0 ura3<math>\Delta</math>0</i>                                                   | EUROSCARF                      |
| <i>ufd2</i>                                    | <i>MAT<math>\alpha</math> his3<math>\Delta</math>1 leu2<math>\Delta</math>0 met15<math>\Delta</math>0 ura3<math>\Delta</math>0<br/>YDL190C::<i>kanMX4</i></i>                        | EUROSCARF                      |
| <i>Ufd2<sup>U-box<math>\Delta</math></sup></i> | <i>MAT<math>\alpha</math> his3<math>\Delta</math>1 leu2<math>\Delta</math>0 met15<math>\Delta</math>0 ura3<math>\Delta</math>0<br/>YDL190C<sup>2568-2886 bp</sup>::<i>HIS3</i></i>   | Chang Liu <i>et al.</i> (2011) |

\*EUROpean Saccharomyces Cerevisiae ARchive for Functional analysis

\*\* American Type Culture Collection

**Table S2.** Plasmids used in this study

| Name                      | Features                                          | Reference or source     |
|---------------------------|---------------------------------------------------|-------------------------|
| pRS416                    | <i>CEN, URA3</i>                                  | Agilent Technologies    |
| pRS416- <i>YAP8-HA</i>    |                                                   | Our unpublished work    |
| pRS416- <i>YAP8-c-myc</i> |                                                   | Amaral et al. (2013)    |
| pRS416- <i>UFD2-HA</i>    |                                                   | This study              |
| pGADT7-Rec                | 2 $\mu$ , <i>LEU2, HA</i>                         | Clontech                |
| pGADT7- <i>T-antigen</i>  |                                                   | Clontech                |
| pGADT7- <i>UFD2</i>       |                                                   | This study              |
| pGBKT7                    | 2 $\mu$ , <i>TRP1, c-myc</i>                      | Clontech                |
| pGBKT7- <i>LamC</i>       |                                                   | Clontech                |
| pGBKT7- <i>p53</i>        |                                                   | Clontech                |
| pGBKT7- <i>YAP8</i>       |                                                   | Our unpublished work    |
| YCplac111                 | <i>CEN, LEU2</i>                                  | Agilent Technologies    |
| YCplac111- <i>UFD2-HA</i> |                                                   | This study              |
| YEplac181                 | 2 $\mu$ , <i>LEU2</i>                             | Agilent Technologies    |
| YEplac181- <i>YAP8-HA</i> |                                                   | Our unpublished work    |
| pGal- <i>MPS1-c-myc</i>   | <i>Integrative, URA3, GAL1<sup>promoter</sup></i> | Chang Liu et al. (2011) |

**Table S3.** Oligonucleotides used in this study

| #  | Name                                              | Sequence (5' – 3' UTR)                                         |
|----|---------------------------------------------------|----------------------------------------------------------------|
| 1  | UFD2-HIS-Fw <sup>D</sup>                          | GGGAAAAGTTAACTTTGAAAGTAGAACCCCTCATTCCATAGATCGTAC<br>GCTGCAGG   |
| 2  | UFD2-HIS-Rv <sup>D</sup>                          | TTGATTAGGGTCAATTTTGCAATTTATTCTATCACTTATTTTAGGGAG<br>ACCGGCAGAT |
| 3  | A1-UFD2 <sup>D</sup>                              | GGCTTGCTGGTACAATATGG                                           |
| 4  | A4-UFD2 <sup>D</sup>                              | CCAGAGCTTTGAGAAGAG                                             |
| 5  | UFD2 400-Fw*                                      | GAAAGGTAAAGTTGAC                                               |
| 6  | UFD2 1300-Fw*                                     | CTTAAACTCAAGGAC                                                |
| 7  | UFD2 2200-Fw*                                     | GGTAAATTAGTGACG                                                |
| 8  | UFD2-pGADT7-Fw <sup>C</sup>                       | ACCGCCATAGAAGATATTTTAC                                         |
| 9  | UFD2-pGADT7-Rv <sup>C</sup>                       | TCACTCGCTTGCTTTATG                                             |
| 10 | pRS416- <i>SmaI</i> -UFD2-P1000-Fw <sup>C</sup>   | GAATTCCTGCAGCCCAATATTCTGTTATTG                                 |
| 11 | HA-UFD2-Rv <sup>C</sup>                           | AGCGTAATCTGGAACATCGTATGGGTACATTCACTTATTCATCA                   |
| 12 | HA-UFD2-Term500-Fw <sup>C</sup>                   | ATGTACCCATACGATGTTCCAGATTACGCTTAGAATAAAATTGCAA                 |
| 13 | UFD2-Term500-pRS416- <i>SmaI</i> -Rv <sup>C</sup> | ACTAGTGGATCCCCCAGTTGGCTGAATTGA                                 |
| 14 | UFD2-Fw●                                          | GACTTCCTGTGGATGAAG                                             |
| 15 | UFD2-Rv●                                          | CTCTCCTCTCTTGTGGTG                                             |
| 16 | ACR2-Fw●                                          | AGGCAACTCAAGGCCTAAT                                            |
| 17 | ACR2-Rv●                                          | GAACATGCCAAGCGTTTGTA                                           |
| 18 | ACR3-Fw●                                          | AAGAGGGTCTGGGGAAGAAA                                           |
| 19 | ACR3-Rv●                                          | GCAATTGCCAGGGATAGTTC                                           |
| 20 | YAP8-Fw●                                          | AACCGCCACATGTAACACT                                            |
| 21 | YAP8-Rv●                                          | TCCAACACACACTGAGAGCAG                                          |
| 22 | ACT1-Fw●                                          | CTATTGGTAACGAAAGATTCA                                          |
| 23 | ACT1-Rv●                                          | CCTTACGGACATCGACATCA                                           |

Fw - forward; Rv - reverse

<sup>D</sup>Gene disruption and mutant confirmation, \*Sequencing, <sup>C</sup> Cloning, ●qRT-PCR
